# Supplementary material
Source: HighWire-hosted journal article supplement (http://www.injuryprevention.com/highwire/filestream/161207/field_highwire_adjunct_files/0/ip-2023-045073supp001_data_supplement.pdf)
Supplement: ip-2023-045073supp001_data_supplement.pdf [file ip-2023-045073supp001_data_supplement.pdf]

## HARMS AND BENEFITS INVENTORY

## SUPPLEMENTAL MATERIAL

## HARMS AND BENEFITS INVENTORY

**Supplemental Table 1.***HBI Scales: Gun Owners vs. Non-Owners*

|                                     | Gun Owner<br>(N = 1,006) |      | Non-Owner<br>(N = 1,001) |      | t      | df   | p-value | Cohen's d |
|-------------------------------------|--------------------------|------|--------------------------|------|--------|------|---------|-----------|
|                                     | Mean                     | SD   | Mean                     | SD   |        |      |         |           |
| Regulation, Cost, and Accessibility | 3.66                     | 2.98 | 6.43                     | 2.90 | -21.08 | 2005 | < .001  | -0.94     |
| Special Restrictions                | 7.52                     | 2.14 | 8.25                     | 1.97 | -7.96  | 2005 | < .001  | -0.36     |
| Permit and Education                | 7.29                     | 2.80 | 8.74                     | 1.94 | -13.42 | 2005 | < .001  | -0.60     |
| Relaxed Restrictions                | 1.72                     | 2.19 | 1.37                     | 2.12 | 3.66   | 2005 | < .001  | 0.16      |
| Hobby and Sport                     | 6.78                     | 2.51 | 4.81                     | 2.77 | 16.75  | 2005 | < .001  | 0.75      |

**Supplemental Table 2.***To what extent do you agree or disagree with the idea that any American can possess a gun?*

|                                     | Strongly or Somewhat Agree<br>(N = 783) |      | Strongly or Somewhat Disagree or Neutral<br>(N = 1222) |      | t      | df   | p-value | Cohen's d |
|-------------------------------------|-----------------------------------------|------|--------------------------------------------------------|------|--------|------|---------|-----------|
|                                     | Mean                                    | SD   | Mean                                                   | SD   |        |      |         |           |
| Regulation, Cost, and Accessibility | 3.44                                    | 2.99 | 6.06                                                   | 2.98 | 19.18  | 2003 | < .001  | 0.88      |
| Special Restrictions                | 7.20                                    | 2.40 | 8.32                                                   | 1.73 | 12.10  | 2003 | < .001  | 0.55      |
| Permit and Education                | 6.89                                    | 2.97 | 8.73                                                   | 1.85 | 17.14  | 2003 | < .001  | -0.43     |
| Relaxed Restrictions                | 2.09                                    | 2.43 | 1.19                                                   | 1.88 | -9.34  | 2003 | < .001  | -0.43     |
| Hobby and Sport                     | 7.00                                    | 2.61 | 5.03                                                   | 2.69 | -16.17 | 2003 | < .001  | -0.74     |

**Supplemental Table 3.***To what extent do you agree or disagree that people should be required to store their gun in a locked manner (e.g., in a safe, locked cabinet, or with an external locking device)?*

|                                     | Strongly or Somewhat Agree<br>(N = 1667) |      | Strongly or Somewhat Disagree or Neutral<br>(N = 340) |      | t      | df   | p-value | Cohen's d |
|-------------------------------------|------------------------------------------|------|-------------------------------------------------------|------|--------|------|---------|-----------|
|                                     | Mean                                     | SD   | Mean                                                  | SD   |        |      |         |           |
| Regulation, Cost, and Accessibility | 5.59                                     | 3.04 | 2.35                                                  | 2.85 | -18.07 | 2005 | < .001  | -1.08     |
| Special Restrictions                | 8.20                                     | 1.83 | 6.34                                                  | 2.55 | -15.88 | 2005 | < .001  | -0.95     |
| Permit and Education                | 8.53                                     | 1.99 | 5.46                                                  | 3.18 | -23.13 | 2005 | < .001  | -1.38     |
| Relaxed Restrictions                | 1.36                                     | 2.08 | 2.43                                                  | 2.33 | 8.42   | 2005 | < .001  | 0.50      |
| Hobby and Sport                     | 5.49                                     | 2.73 | 7.28                                                  | 2.81 | 10.97  | 2005 | < .001  | 0.65      |

## HARMS AND BENEFITS INVENTORY

**Supplemental Table 4.**

*To what extent do you agree or disagree that people who are lawfully able to openly carry a gun, other than law enforcement, should be allowed to do so?*

|                                     | Strongly or Somewhat Agree<br>(N = 1010) |      | Strongly or Somewhat Disagree or Neutral<br>(N = 997) |      | t      | df   | p-value | Cohen's d |
|-------------------------------------|------------------------------------------|------|-------------------------------------------------------|------|--------|------|---------|-----------|
|                                     | Mean                                     | SD   | Mean                                                  | SD   |        |      |         |           |
| Regulation, Cost, and Accessibility | 3.30                                     | 2.88 | 6.81                                                  | 2.56 | 28.88  | 2005 | < .001  | 1.29      |
| Special Restrictions                | 7.20                                     | 2.29 | 8.58                                                  | 1.60 | 15.56  | 2005 | < .001  | 0.69      |
| Permit and Education                | 6.98                                     | 2.85 | 9.06                                                  | 1.52 | 20.30  | 2005 | < .001  | 0.91      |
| Relaxed Restrictions                | 1.98                                     | 2.33 | 1.88                                                  | 0.06 | -9.31  | 2005 | < .001  | -0.42     |
| Hobby and Sport                     | 7.05                                     | 2.54 | 4.53                                                  | 2.51 | -22.36 | 2005 | < .001  | -1.00     |

## HARMS AND BENEFITS INVENTORY

**THE HARMS AND BENEFITS INVENTORY (HBI)**

INSTRUCTIONS. On a scale from 0 to 10, where 0 means completely oppose and 10 means completely support, please rate the extent to which you would support or oppose a policy or practice that may result in each of the following.

| <b>Strongly Oppose</b> |   |   |   |   | <b>Neither Support nor Oppose</b> |   |   |   |   | <b>Strongly Support</b> |
|------------------------|---|---|---|---|-----------------------------------|---|---|---|---|-------------------------|
| 0                      | 1 | 2 | 3 | 4 | 5                                 | 6 | 7 | 8 | 9 | 10                      |

- \_\_\_ 1. Increases the cost to purchase a gun
- \_\_\_ 2. Increases the cost of ammunition
- \_\_\_ 3. Increases the time it takes a person to get to and ready a gun in their home
- \_\_\_ 4. Reduces the number of available licensed gun dealers
- \_\_\_ 5. Requires a permit to purchase a gun
- \_\_\_ 6. Makes it more difficult for a person with mild mental health problems to own a gun
- \_\_\_ 7. Makes it more difficult for a person with serious mental health problems (e.g., suicidal/homicidal behavior, self-harm, hallucinations) to own a gun
- \_\_\_ 8. Makes it more difficult for a person with minor, non-violent legal offenses (e.g., minor drug possession, theft, forgery) to own a gun
- \_\_\_ 9. Makes it more difficult for a person convicted of violent misdemeanors, such as simple assault (i.e., resulting in only minor injuries) to own a gun
- \_\_\_ 10. Makes it more difficult for a person convicted of domestic violence to own a gun
- \_\_\_ 11. Makes it more difficult to drive across state lines with a gun
- \_\_\_ 12. Requires new gun owners to demonstrate knowledge of gun safety
- \_\_\_ 13. Requires gun users to receive continuing education around gun safety
- \_\_\_ 14. Increases government regulation of how guns are handled
- \_\_\_ 15. Allows a person with a felony conviction to obtain a gun
- \_\_\_ 16. Allows a person with a history of violent behavior to obtain a gun
- \_\_\_ 17. Allows a person with serious mental health problems to obtain a gun

**HARMS AND BENEFITS INVENTORY**

- \_\_\_ 18. Allows a person with a domestic violence conviction to obtain a gun
- \_\_\_ 19. Makes it easier to purchase a gun without a permit
- \_\_\_ 20. Makes it easier to participate in shooting sports
- \_\_\_ 21. Makes it easier to participate in hobbies such as gun collection and restoration

**SCORING INSTRUCTIONS****Regulation, Cost, and Accessibility**

Average item #'s: 1, 2, 3, 4, 11, 14 = \_\_\_\_\_

**Special Restrictions**

Average item #'s: 6, 7, 8, 9, 10 = \_\_\_\_\_

**Permit and Education**

Average item #'s: 5, 12, 13, 19 = \_\_\_\_\_

**Relaxed Restrictions**

Average item #'s: 15, 16, 17, 18 = \_\_\_\_\_

**Hobby and Sport**

Average item #'s: 20, 21 = \_\_\_\_\_

*Note.* The items above have been renumbered and do not align perfectly with the HBI items as presented in the manuscript, which include items that have been dropped.
